# Supplementary material
Source: PubMed Central journal article supplement (PMC3719787)
Supplement: AAC.02606-12_zac999102042so1.pdf [file AAC.02606-12_zac999102042so1.pdf]

## 1 SUPPLEMENTARY TABLES

### 2 Table S1. Strains and plasmid used and constructed in this study.

3 List of strains used, as well as the different single or multiple transduction, deletion and  
 4 overexpression mutants performed to determine genes implicated in partial resistance to  
 5 G2cps. Km: kanamycin; Cm: chloramphenicol; aTc: anhydrotetracycline.

| Strains or plasmid                                   | Characteristics – construction                                                                                                                | Reference             |
|------------------------------------------------------|-----------------------------------------------------------------------------------------------------------------------------------------------|-----------------------|
| <b><i>E. coli</i> strains</b>                        |                                                                                                                                               |                       |
| TG1-c                                                | F'[traD36 <i>proAB</i> + <i>lacIq lacZΔM15</i> ] <i>supE hsdΔ5 thi Δ</i> (lac-proAB) <i>latt-gfp cat</i> – Km <sup>R</sup>                    | Laboratory collection |
| CFT073 <i>ΔmchB</i>                                  | Uropathogenic <i>E. coli</i> CFT073 <i>ΔmchB</i> ::Km. MchB microcin-defective; – Km <sup>R</sup>                                             | Laboratory collection |
| iai44 <sup>1</sup>                                   | <i>E. coli</i> Group A1 – human uropathogenic strain                                                                                          | (1)                   |
| Ec094 <sup>1</sup>                                   | <i>E. coli</i> Group D – commensal strain isolated from Pyrenean roe-deer                                                                     | (2)                   |
| iai73 <sup>1</sup>                                   | <i>E. coli</i> Group B23 –human uropathogenic strain                                                                                          | (1)                   |
| H19 <sup>1</sup>                                     | <i>E. coli</i> Group B1 – human enterohemorrhagic strain                                                                                      | (3)                   |
| TG1 <i>ΔyjhB</i> ::KmFRT                             | Transduction of <i>ΔyjhB</i> ::KmFRT from mutant Keio JW5768                                                                                  | This study            |
| TG1 <i>ΔyjkZ-yjhB</i> ::Cm                           | Inactivation of the genomic region <i>yjkZ-yjhB</i> by the Cm cassette                                                                        | This study            |
| TG1 <i>Δtar</i> ::KmFRT                              | Transduction of <i>Δtar</i> ::KmFRT from mutant Keio JW1875                                                                                   | This study            |
| TG1 <i>Δtar</i> ::FRT<br><i>ΔyjhB</i> ::KmFRT        | 1) Km cassette removal from <i>Δtar</i> ::KmFRT<br>2) Transduction of <i>ΔyjhB</i> ::KmFRT from mutant Keio JW5768 in <i>Δtar</i> ::FRT       | This study            |
| TG1 <i>Δtar</i> ::KmFRT <i>ΔyjkZ-yjhB</i> ::Cm       | Transduction of <i>Δtar</i> ::KmFRT from mutant Keio JW1875 in the <i>ΔyjkZ-yjhB</i> ::Cm mutant                                              | This study            |
| TG1 <i>ptsH</i> ::psc189Km                           | Transduction of <i>ptsH</i> ::psc189Km from mutant D                                                                                          | This study            |
| TG1 <i>ΔydcF</i> ::KmFRT                             | Transduction of <i>ΔydcF</i> ::KmFRT from mutant Keio JW1411                                                                                  | This study            |
| TG1 <i>ptsH</i> ::psc189<br><i>ΔydcF</i> ::KmFRT     | 1) Km cassette removal from <i>ptsH</i> ::psc189Km<br>2) Transduction of <i>ΔydcF</i> ::KmFRT from mutant Keio JW1411 in <i>ptsH</i> ::psc189 | This study            |
| TG1 <i>pflB</i> ::psc189Km                           | Transduction of <i>pflB</i> ::psc189Km from mutant L                                                                                          | This study            |
| TG1 <i>ΔpflB</i> ::KmFRT                             | Transduction of <i>ΔpflB</i> ::KmFRT from mutant Keio JW0886                                                                                  | This study            |
| TG1 <i>ΔyggJ</i> ::KmFRT                             | Transduction of <i>ΔyggJ</i> ::KmFRT from mutant Keio JW2913                                                                                  | This study            |
| TG1 <i>ΔpflB</i> ::FRT<br><i>ΔyggJ</i> ::KmFRT       | 1) Km cassette removal from <i>ΔpflB</i> ::KmFRT<br>2) Transduction of <i>ΔyggJ</i> ::KmFRT from mutant Keio JW2913 in <i>ΔpflB</i> ::FRT     | This study            |
| TG1 <i>ΔdinG</i> ::KmFRT                             | Transduction of <i>ΔdinG</i> ::KmFRT from mutant Keio JW0784                                                                                  | This study            |
| TG1 <i>ΔydcG</i> ::KmFRT                             | Transduction of <i>ΔydcG</i> ::KmFRT from mutant Keio JW5137                                                                                  | This study            |
| TG1 <i>ΔdinG</i> ::FRT<br><i>ΔydcG</i> ::KmFRT       | 1) Km cassette removal from <i>ΔdinG</i> ::KmFRT<br>2) Transduction of <i>ΔydcG</i> ::KmFRT from mutant Keio JW5137 in <i>ΔdinG</i> ::FRT     | This study            |
| TG1 <i>ΔybiL</i> ::Cm                                | Inactivation of gene <i>ybiL</i> by the Cm cassette                                                                                           | This study            |
| TG1 <i>ΔaraF</i> ::KmFRT                             | Inactivation of gene <i>araF</i> by the KmFRT cassette                                                                                        | This study            |
| TG1 <i>ΔyecI</i> ::KmFRT                             | Inactivation of gene <i>yecI</i> by the KmFRT cassette                                                                                        | This study            |
| TG1 <i>ΔaraF-yecI</i> ::Cm                           | Inactivation of the genomic region <i>araF-yecI</i> by the Cm cassette                                                                        | This study            |
| TG1 <i>ybiL</i> ::psc189Km<br><i>ΔaraF-yecI</i> ::Cm | Transduction of <i>ybiL</i> ::psc189Km from mutant E in the <i>ΔaraF-yecI</i> ::Cm mutant                                                     | This study            |
| TG1 KmRExTet- <i>araF</i>                            | Insertion of the aTc-inducible KmRExTet cassette upstream from <i>araF</i>                                                                    | This study            |
| TG1 KmRExTet- <i>yecI</i>                            | Insertion of the aTc-inducible KmRExTet cassette upstream from <i>yecI</i>                                                                    | This study            |
| TG1 <i>ΔphnD</i> ::KmFRT                             | Transduction of <i>ΔphnD</i> ::KmFRT from mutant Keio JW4066                                                                                  | This study            |
| TG1 <i>ΔyeeW-yoeF</i> ::Cm                           | Inactivation of genomic region <i>yeeW-yoeF</i> by the Cm cassette                                                                            | This study            |

|                                                      |                                                                                                                                                        |            |
|------------------------------------------------------|--------------------------------------------------------------------------------------------------------------------------------------------------------|------------|
| TG1 <i>phnD</i> ::psc189Km<br><i>ΔyeeW-yoeF</i> ::Cm | Transduction of <i>phnD</i> ::psc189Km from mutant M in <i>ΔyeeW-yoeF</i> ::Cm mutant                                                                  | This study |
| TG1 <i>ΔyegO</i> ::Cm                                | Inactivation of gene <i>yegO</i> by the Cm cassette                                                                                                    | This study |
| TG1 <i>phnD</i> ::psc189Km<br><i>ΔyegO</i> ::Cm      | Transduction of <i>phnD</i> ::psc189Km from mutant P in the <i>ΔyegO</i> ::Cm mutant                                                                   | This study |
| <b>Plasmids</b>                                      |                                                                                                                                                        |            |
| Tnpsc189                                             | <i>oriT</i> $\Pi$ -dependent <i>ori</i> R6K <i>mariner</i> -based transposon TnSC189. Km <sup>R</sup> and Ap <sup>R</sup>                              | (4)        |
| pCP20                                                | Plasmid carrying the <i>flp</i> recombinase gene; 30°C replication; CmR and AmpR                                                                       | (1)        |
| pKOBEGA                                              | Arabinose-inducible $\lambda$ -red recombinase expression plasmid ( <i>oriR101</i> , <i>repA101ts</i> , P <sub>araB</sub> - <i>gam-bet-exo</i> , AmpR) | (5)        |

1  
2 <sup>1</sup> Anti-biofilm activity of culture supernatants against WT TG1-c was resistant to proteinase K  
3 and heat treatments, suggesting a polysaccharidic compound (data not shown).

- 4  
5 1. Escobar-Paramo, P., K. Grenet, A. Le Menac'h, L. Rode, E. Salgado, C. Amorin, S.  
6 Gouriou, B. Picard, M. C. Rahimy, A. Andremont, E. Denamur, and R. Ruimy. 2004.  
7 Large-scale population structure of human commensal *Escherichia coli* isolates.  
8 *Applied and environmental microbiology* 70:5698-700.
- 9 2. Escobar-Paramo, P., A. Le Menac'h, T. Le Gall, C. Amorin, S. Gouriou, B. Picard, D.  
10 Skurnik, and E. Denamur. 2006. Identification of forces shaping the commensal  
11 *Escherichia coli* genetic structure by comparing animal and human isolates. *Environ*  
12 *Microbiol* 8:1975-84.
- 13 3. Willshaw, G., H. Smith, S. Scotland, and B. Rowe. 1985. Cloning of genes  
14 determining the production of vero cytotoxin by *Escherichia coli*. *Microbiology*  
15 131:3047.
- 16 4. Chiang, S. L., and E. J. Rubin. 2002. Construction of a *mariner*-based transposon for  
17 epitope-tagging and genomic targeting. *Gene* 296:179-85.
- 18 5. Chaverroche, M. K., J. M. Ghigo, and C. d'Enfert. 2000. A rapid method for efficient  
19 gene replacement in the filamentous fungus *Aspergillus nidulans*. *Nucleic Acids Res*  
20 28:E97.

21  
22

1 **Table S2. Primers used in this study.**

- 2 List of primers used to determine transposon (Tn) and Mu insertion points within the genome  
 3 of mutants partially resistant to G2cps, for gene inactivation and overexpression and for  
 4 verification of mutations performed.

| Primers                                            | Sequence                                                   |
|----------------------------------------------------|------------------------------------------------------------|
| <b>Determination of Tn and Mu insertion points</b> |                                                            |
| Mu1470.500-5                                       | 5'-GTTACTTTTTCAAAAATTTAAAC-3'                              |
| Mu1470.500-3                                       | 5'-CGCAGATAATCTGCAATCAG-3'                                 |
| ARBN1                                              | 5'-GGCCACGCGTTCGACTAGTACNNNNNNNNNNGATAT-3'                 |
| ARBN6                                              | 5'-GGCCACGCGTTCGACTAGTACNNNNNNNNNNNACGCC-3'                |
| ARBbis                                             | 5'-GGCCACGCGTTCGACTAGTAC-3'                                |
| pscIR2Km                                           | 5'-CTGACCGCTTCCTCGTGTCTTACGG-3'                            |
| pscIR2Kmbis                                        | 5'-TTCTGAGCGGGACTCTGGGGTACG-3'                             |
| MuR200-5                                           | 5'-AATTTAATCAGTATCGCTAC-3'                                 |
| MuL200-3                                           | 5'-GTTTTGAACGTTTTTTGAAG-3'                                 |
| MuR100-5                                           | 5'-ATGTAATGAATAAAAAGCAG-3'                                 |
| MuL100-3                                           | 5'-CTAAAATTTGCACTACAGGC-3'                                 |
| <b>Gene inactivation</b>                           |                                                            |
| yjgZ.500-5                                         | 5'-CACTGGTACTGCAAGAGGGGGCCT-3'                             |
| yjgZ.Cm.L3                                         | 5'-CTGCGAAGTGATCTTCCGTACAGGAAGGGCTGAATCTCTCCC<br>TGAAAC-3' |
| yjhB.Cm.L5                                         | 5'-GATGAGTGGCAGGGCGGGCGTAATGGCTAAATGATTGGAGG<br>CTTTAT-3'  |
| yjhB.500-3                                         | 5'-CATAATATGCCCGGCCATAAAGGT-3'                             |
| ybiL.500-5                                         | 5'-GATCTGGAGGATAAACTGGCA-3'                                |
| ybiL.Cm.L3                                         | 5'-CTGCGAAGTGATCTTCCGTACAGGTTTGAGGTGACTTTTTCT<br>TATAT-3'  |
| ybiL.Cm.L5                                         | 5'-GATGAGTGGCAGGGCGGGCGTAATTCAGATGTGGGGCGCAG GCC-3'        |
| ybiL.500-3                                         | 5'-TGTGGATGGCTGCGTACTGCG-3'                                |
| araF.500-5                                         | 5'-CGTTATTACACCATTTCAAAAAC-3'                              |
| araF.KmFRT.L3                                      | 5'-GAAGCAGCTCCAGCCTACACAGGTTCTCTCCAGCTTTAGTGTC GT-3'       |
| araF.KmFRT.L5                                      | 5'-GAACTTCGGAATAGGAACTAAAGAAGAAGTGGAGAAAAAAGG TT-3'        |
| araF.500-3                                         | 5'-TCCGGCACGAGATGCAGTTCTGGT-3'                             |
| yecl.500-5                                         | 5'-GAACACGTATAATGAGAGCCATC-3'                              |
| yecl.KmFRT.L3                                      | 5'-GAAGCAGCTCCAGCCTACACAACCTAATATCCTTATATCCAGA AG-3'       |
| yecl.KmFRT.L5                                      | 5'-GAACTTCGGAATAGGAACTAACATCATCGGCGCTAATGCATTG CG-3'       |
| yecl.500-3                                         | 5'-GGCTTTCAAAAATGCTATCAGGAG-3'                             |
| araF.Cm.L5-L3                                      | 5'-CTGCGAAGTGATCTTCCGTACAGGAGAAGAAGTGGAGAAAA<br>AAGGTT-3'  |
| yecl.Cm.L5                                         | 5'-GATGAGTGGCAGGGCGGGCGTAACATCATCGGCGCTAATGC<br>ATTGCG-3'  |
| yeeW.500-5                                         | 5'-CTGTATTACCCGGGCAGGCGG-3'                                |
| yeeW.Cm.L3                                         | 5'-CTGCGAAGTGATCTTCCGTACAGGTTCCGCTCCGGATACTTA<br>CCCAGG-3' |
| yoeF.Cm.L3                                         | 5'-CTGCGAAGTGATCTTCCGTACAGGGGAACGTAGTTCTCACCA<br>ATAAAT-3' |
| yoeF.500-5                                         | 5'-GGCAAGAGAAGATGTCCTTACCCT-3'                             |
| yegO.500-5                                         | 5'-CATGATGATCGACTTCGCGCTGGCT-3'                            |
| yegO.Cm.L3                                         | 5'-CTGCGAAGTGATCTTCCGTACAGGTTACGCCTCCTCTTCATG ACGG-<br>3'  |
| yegO.Cm.L5                                         | 5'-GATGAGTGGCAGGGCGGGCGTAAATGACAGATCTTCCCGAC<br>AGCACCC-3' |
| yegO.500-3                                         | 5'-CCGCCAACGCCCTGTAACGCGC-3'                               |

| <b>Gene overexpression</b>                   |                                                              |
|----------------------------------------------|--------------------------------------------------------------|
| <i>araF</i> .KmRexTet.L-3                    | 5'-GAGAATCCAAGCACTAGTAACCACTCGTTTTGTGTAGGGCAAA<br>AACG-3'    |
| <i>araF</i> .KmRexTet.L-5                    | 5'-CACATCAGCAGGACGCACTGACCGACACTAAAGCTGGAGAGA<br>ACCATG-3'   |
| <i>araF</i> .KmRexTet.500-3                  | 5'-GTACGGCGGGCGGGCGGTATCCAGT-3'                              |
| <i>yecI</i> .KmRexTet.L-3                    | 5'-GAGAATCCAAGCACTAGTAACCACTCGAAGTGGAGAGGTGCAAG<br>ATAAAT-3' |
| <i>yecI</i> .KmRexTet.L-5                    | 5'-CACATCAGCAGGACGCACTGACCGATGGATATAAGGATATTA<br>GGTATGG-3'  |
| <i>yecI</i> .KmRexTet.500-3                  | 5'-TGACACGACATTCAGAACATG-3'                                  |
| <b>Verification of genetic modifications</b> |                                                              |
| <i>yjhB</i> .ext5                            | 5'-ATACTGCAAAGGAAAACAGCTA-3'                                 |
| <i>yjhB</i> .ext3                            | 5'-CGTGCATATTGAACCCCATTTGA-3'                                |
| <i>tar</i> .ext5                             | 5'-CACGGTAGTTATCGTCCCTGAAT-3'                                |
| <i>tar</i> .ext3                             | 5'-TTGCAATCCCCTGACGTGCTC-3'                                  |
| <i>ptsH</i> .ext3                            | 5'-CTCTTCTGGAGCAGCTGTTG-3'                                   |
| <i>ptsH</i> .ext5                            | 5'-ACTTCTTGCTGGAACATTGTATTTTC-3'                             |
| <i>ydcF</i> .ext5                            | 5'-GAAGACGTGAAAGAGATCCGT-3'                                  |
| <i>ydcF</i> .ext3                            | 5'-GCGTTCAATAGCAGGCAACGCT-3'                                 |
| <i>pflB</i> .ext5                            | 5'-CCTGATGGTATGTCTGGCA-3'                                    |
| <i>pflB</i> .ext3                            | 5'-GAAGCGTTCATAAAGTGGC-3'                                    |
| <i>yggJ</i> .ext5                            | 5'-ATGGCGATCGCGGCAACTTTAT-3'                                 |
| <i>yggJ</i> .ext3                            | 5'-CTTGTTAACGATCAGCGTCCCTTTCT-3'                             |
| <i>pflB</i> .ATG+75-3                        | 5'-CTGAATGAAGTCACGGACGTT-3'                                  |
| <i>dinG</i> .ext5                            | 5'-TCTTTGACCGACTCCCAGTTTT-3'                                 |
| <i>dinG</i> .ext3                            | 5'-GCACGCGGGTTGGATCTTCGCT-3'                                 |
| <i>ycdG</i> .ext5                            | 5'-TCTGCAGTGTGACCGATACGCC-3'                                 |
| <i>ycdG</i> .ext3                            | 5'-TTTGCAGAAGACCGCGAAAGAG-3'                                 |
| <i>ybiL</i> .ext5                            | 5'-AACTGGCGCATCAAACCTAAGC-3'                                 |
| <i>ybiL</i> .ext3                            | 5'-AACAGCGTGGCAGAAAGGTCAG-3'                                 |
| <i>araF</i> .ext5                            | 5'-TTTCCACATCTTTGAGTTGC-3'                                   |
| <i>araF</i> .ext3                            | 5'-GGCAGCTGGCCGAGATAG-3'                                     |
| <i>yecI</i> .ext5                            | 5'-ACGTCATTTCATTTCGTCATT-3'                                  |
| <i>yecI</i> .ext3                            | 5'-GATGTGACTATCGCTGAAG-3'                                    |
| <i>phnD</i> .ext5                            | 5'-GGTGCATTTTGCCCATCAG-3'                                    |
| <i>phnD</i> .ext3                            | 5'-GGTTTTTCGGCGCTCATCAG-3'                                   |
| <i>yeeW</i> .ext5                            | 5'-ATCTGCATATCAGGAAAATCTT-3'                                 |
| <i>yoeF</i> .ext5                            | 5'-ACAGCACTGTTGTCCTGTATTAAG-3'                               |
| <i>yegO</i> .ext5                            | 5'-GTTGCTGATTGCTGGTAGCGAACT-3'                               |
| <i>yegO</i> .ext3                            | 5'-CCATATATTGCTCGCGCGGTACG-3'                                |

## SUPPLEMENTARY FIGURES

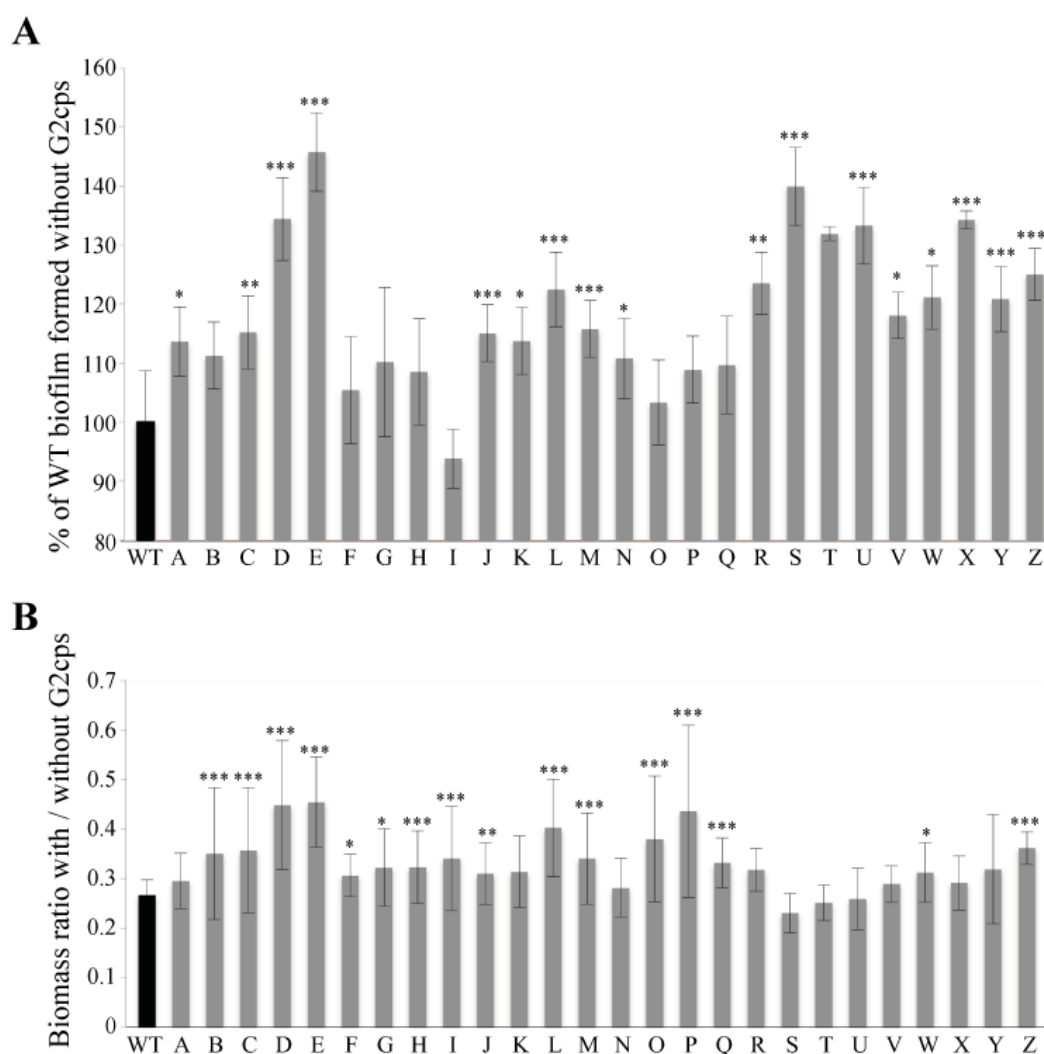

**Fig. S1. Determination of mutants partially resistant to G2cps.**

**(A)** Quantification of biofilm formed by WT TG1-c and the 26 mutants partially resistant to G2cps without G2cps. Biofilm quantities were standardized and p-values were determined according to biofilm formed by WT (black) (value: 100). **(B)** WT and mutant biofilm ratio determined after division of the biomass formed in the presence of G2cps by the biomass formed without G2cps. The higher the biofilm ratio, the more resistant the mutant is. p-values were determined compared to WT biofilm ratio (black).

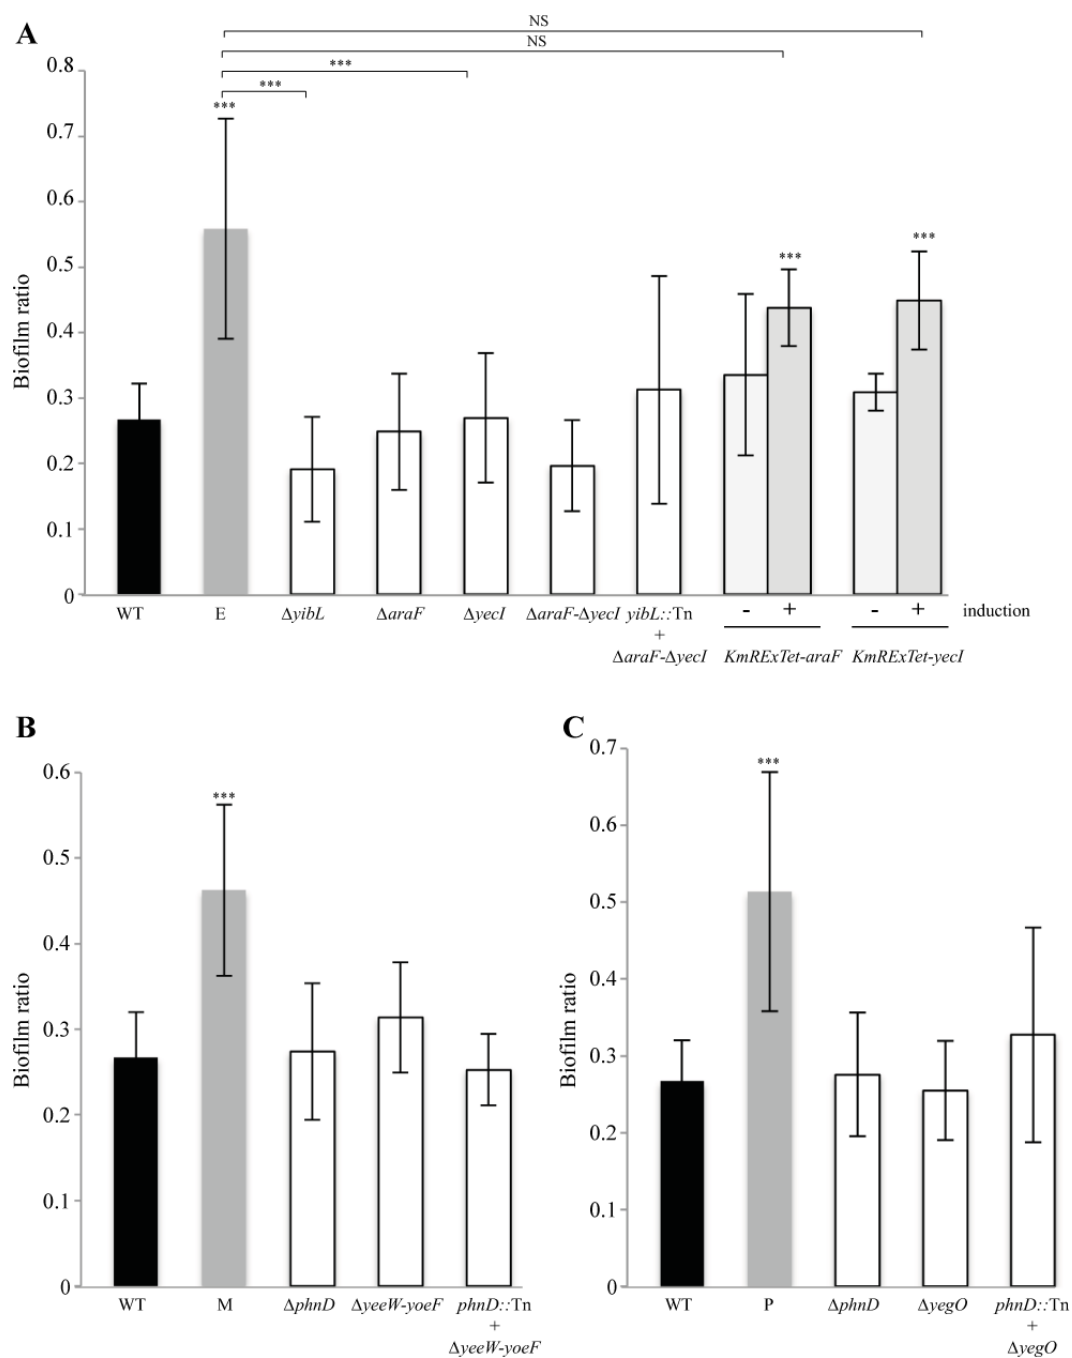

**Fig. S2. Determination of genes implicated in partial resistance to G2cps.**

Biofilm ratio of WT TG1-c, mutants E, M and P partially resistant to G2cps and either single or multiple deletion and transduction mutants, as well as inducible overexpression mutants, carried out according to the different insertion points of both the transposon (Tn) and Mu within the genome of mutants E (A), M (B) and P (C). p-values were determined compared to both the WT biofilm ratio (black) and E, M or P mutants (gray).
